# Supplementary material
Source: PubMed Central journal article supplement (PMC3068220)
Supplement: NIHMS278784-supplement-1_si_001.pdf [file NIHMS278784-supplement-1_si_001.pdf]

## SUPPLEMENTAL INFORMATION

### **Catalytic vs. Inhibitory Promiscuity and the Evolution of New Enzymatic Function**

Robert S. Foti,<sup>1</sup> Mathew Honaker<sup>2</sup>, Abhinav Nath,<sup>3</sup> Josh T. Pearson,<sup>1</sup> Brian Buttrick,<sup>4</sup> Nina Isoherranen,<sup>4</sup> and William M. Atkins<sup>5</sup>

The probes substrates used were: CYP19A1, testosterone; CYP26A1, all trans retinoic acid; CYP4F12, terfenadine; CYP1A2, phenacetin; CYP2C9, diclofenac, CYP2C19, (s)-mephenytoin; CYP2D6, dextromethorphan; CYP3A4, midazolam. For CYP26A1, the  $k_{cat}/K_M$  values were determined by HPLC using authentic product as standard, rather than by substrate depletion methods. In table 1,  $k_{cat}$  and  $K_M$  have their standard definitions and  $k \rightarrow 0$  is the initial rate extrapolated from substrate depletion.

|                   | CYP1A2 |      |       |      | CYP2C8 |      |       |      | CYP2C9 |      |       |      | CYP2C19 |      |       |      | CYP2D6 |      |       |      |
|-------------------|--------|------|-------|------|--------|------|-------|------|--------|------|-------|------|---------|------|-------|------|--------|------|-------|------|
|                   | Km     | k->0 | Clint | Vmax | Km     | k->0 | Clint | Vmax | Km     | k->0 | Clint | Vmax | Km      | k->0 | Clint | Vmax | Km     | k->0 | Clint | Vmax |
| Amiodarone        | DNC*   | DNC  | ---   | ---  | DNC    | DNC  | ---   | ---  | DNC    | DNC  | ---   | ---  | DNC     | DNC  | ---   | ---  | DNC    | DNC  | ---   | ---  |
| Amitriptyline     | ---    | ---  | ---   | ---  | ---    | ---  | ---   | ---  | ---    | ---  | ---   | ---  | DNC     | DNC  | ---   | ---  | 7.08   | 0.05 | 4.60  | 32.6 |
| Artemisinin       | 0.03   | 0.04 | 3.90  | 0.1  | 0.05   | 0.05 | 4.90  | 0.2  | ---    | ---  | ---   | ---  | ---     | ---  | ---   | ---  | ---    | ---  | ---   | ---  |
| Astemizole        | ---    | ---  | ---   | ---  | ---    | ---  | ---   | ---  | ---    | ---  | ---   | ---  | ---     | ---  | ---   | ---  | 6.02   | 0.05 | 4.60  | 27.7 |
| Atenolol          | ---    | ---  | ---   | ---  | ---    | ---  | ---   | ---  | ---    | ---  | ---   | ---  | ---     | ---  | ---   | ---  | ---    | ---  | ---   | ---  |
| Bepridil          | ---    | ---  | ---   | ---  | ---    | ---  | ---   | ---  | 0.99   | 0.01 | 1.20  | 1.2  | 11.13   | 0.03 | 2.90  | 32.3 | ---    | ---  | ---   | ---  |
| Budesonide        | ---    | ---  | ---   | ---  | ---    | ---  | ---   | ---  | ---    | ---  | ---   | ---  | ---     | ---  | ---   | ---  | ---    | ---  | ---   | ---  |
| Carbamazepine     | ---    | ---  | ---   | ---  | ---    | ---  | ---   | ---  | ---    | ---  | ---   | ---  | ---     | ---  | ---   | ---  | ---    | ---  | ---   | ---  |
| chloroquine       | ---    | ---  | ---   | ---  | ---    | ---  | ---   | ---  | ---    | ---  | ---   | ---  | ---     | ---  | ---   | ---  | 4.24   | 0.02 | 1.90  | 8.1  |
| Chlorpheniramine  | ---    | ---  | ---   | ---  | ---    | ---  | ---   | ---  | ---    | ---  | ---   | ---  | ---     | ---  | ---   | ---  | 1.15   | 0.02 | 2.40  | 2.8  |
| Cimetidine        | ---    | ---  | ---   | ---  | ---    | ---  | ---   | ---  | ---    | ---  | ---   | ---  | ---     | ---  | ---   | ---  | ---    | ---  | ---   | ---  |
| Cisapride         | ---    | ---  | ---   | ---  | ---    | ---  | ---   | ---  | ---    | ---  | ---   | ---  | ---     | ---  | ---   | ---  | ---    | ---  | ---   | ---  |
| Clotrimazole      | ---    | ---  | ---   | ---  | ---    | ---  | ---   | ---  | ---    | ---  | ---   | ---  | ---     | ---  | ---   | ---  | ---    | ---  | ---   | ---  |
| Cyclosporin       | ---    | ---  | ---   | ---  | ---    | ---  | ---   | ---  | ---    | ---  | ---   | ---  | ---     | ---  | ---   | ---  | ---    | ---  | ---   | ---  |
| Danazol           | ---    | ---  | ---   | ---  | 0.14   | 0.04 | 4.20  | 0.6  | ---    | ---  | ---   | ---  | ---     | ---  | ---   | ---  | ---    | ---  | ---   | ---  |
| Dexamethasone     | ---    | ---  | ---   | ---  | ---    | ---  | ---   | ---  | DNC    | DNC  | ---   | ---  | ---     | ---  | ---   | ---  | ---    | ---  | ---   | ---  |
| Digoxin           | ---    | ---  | ---   | ---  | ---    | ---  | ---   | ---  | ---    | ---  | ---   | ---  | ---     | ---  | ---   | ---  | ---    | ---  | ---   | ---  |
| Diltiazem         | ---    | ---  | ---   | ---  | ---    | ---  | ---   | ---  | ---    | ---  | ---   | ---  | ---     | ---  | ---   | ---  | ---    | ---  | ---   | ---  |
| Diphenhydramine   | ---    | ---  | ---   | ---  | ---    | ---  | ---   | ---  | ---    | ---  | ---   | ---  | ---     | ---  | ---   | ---  | 1.65   | 0.05 | 4.50  | 7.4  |
| Diphenylhydantoin | ---    | ---  | ---   | ---  | ---    | ---  | ---   | ---  | ---    | ---  | ---   | ---  | ---     | ---  | ---   | ---  | ---    | ---  | ---   | ---  |
| Erythromycin      | ---    | ---  | ---   | ---  | ---    | ---  | ---   | ---  | ---    | ---  | ---   | ---  | ---     | ---  | ---   | ---  | ---    | ---  | ---   | ---  |
| Fluconazole       | ---    | ---  | ---   | ---  | ---    | ---  | ---   | ---  | ---    | ---  | ---   | ---  | ---     | ---  | ---   | ---  | ---    | ---  | ---   | ---  |
| Flurbiprofen      | ---    | ---  | ---   | ---  | ---    | ---  | ---   | ---  | ---    | ---  | ---   | ---  | 0.12    | 0.03 | 2.50  | 0.3  | ---    | ---  | ---   | ---  |
| Fluvoxamine       | ---    | ---  | ---   | ---  | ---    | ---  | ---   | ---  | ---    | ---  | ---   | ---  | ---     | ---  | ---   | ---  | 0.84   | 0.04 | 4.40  | 3.7  |
| Haloperidol       | ---    | ---  | ---   | ---  | ---    | ---  | ---   | ---  | ---    | ---  | ---   | ---  | ---     | ---  | ---   | ---  | ---    | ---  | ---   | ---  |
| Isradipine        | ---    | ---  | ---   | ---  | 1.76   | 0.02 | 1.90  | 3.3  | ---    | ---  | ---   | ---  | 5.35    | 0.02 | 1.50  | 8.0  | ---    | ---  | ---   | ---  |
| Ivermectin        | ---    | ---  | ---   | ---  | ---    | ---  | ---   | ---  | ---    | ---  | ---   | ---  | ---     | ---  | ---   | ---  | ---    | ---  | ---   | ---  |
| Ketoconazole      | ---    | ---  | ---   | ---  | ---    | ---  | ---   | ---  | ---    | ---  | ---   | ---  | ---     | ---  | ---   | ---  | ---    | ---  | ---   | ---  |
| Lansoprazole      | ---    | ---  | ---   | ---  | ---    | ---  | ---   | ---  | DNC    | DNC  | ---   | ---  | ---     | ---  | ---   | ---  | ---    | ---  | ---   | ---  |
| Loratadine        | ---    | ---  | ---   | ---  | ---    | ---  | ---   | ---  | ---    | ---  | ---   | ---  | 0.42    | 0.05 | 4.70  | 2.0  | 3.27   | 0.05 | 4.90  | 16.0 |
| Lovastatin        | ---    | ---  | ---   | ---  | 0.40   | 0.04 | 3.70  | 1.5  | ---    | ---  | ---   | ---  | ---     | ---  | ---   | ---  | ---    | ---  | ---   | ---  |
| Mefloquine        | ---    | ---  | ---   | ---  | ---    | ---  | ---   | ---  | ---    | ---  | ---   | ---  | ---     | ---  | ---   | ---  | ---    | ---  | ---   | ---  |
| Methoxypsoralen   | 0.18   | 0.04 | 4.30  | 0.8  | ---    | ---  | ---   | ---  | ---    | ---  | ---   | ---  | ---     | ---  | ---   | ---  | ---    | ---  | ---   | ---  |
| Naproxen          | ---    | ---  | ---   | ---  | ---    | ---  | ---   | ---  | ---    | ---  | ---   | ---  | ---     | ---  | ---   | ---  | ---    | ---  | ---   | ---  |
| Nicardipine       | ---    | ---  | ---   | ---  | 0.01   | 0.09 | 9.10  | 0.1  | ---    | ---  | ---   | ---  | 1.73    | 0.03 | 3.20  | 5.5  | 3.49   | 0.03 | 2.70  | 9.4  |
| Nifedipine        | ---    | ---  | ---   | ---  | ---    | ---  | ---   | ---  | ---    | ---  | ---   | ---  | DNC     | DNC  | ---   | ---  | DNC    | DNC  | ---   | ---  |
| Norfloxacin       | ---    | ---  | ---   | ---  | ---    | ---  | ---   | ---  | ---    | ---  | ---   | ---  | 0.56    | 0.01 | 1.20  | 0.7  | ---    | ---  | ---   | ---  |
| Orphenadrine      | ---    | ---  | ---   | ---  | ---    | ---  | ---   | ---  | ---    | ---  | ---   | ---  | ---     | ---  | ---   | ---  | ---    | ---  | ---   | ---  |
| Paclitaxel        | ---    | ---  | ---   | ---  | 1.22   | 0.01 | 1.40  | 1.7  | DNC    | DNC  | ---   | ---  | ---     | ---  | ---   | ---  | ---    | ---  | ---   | ---  |
| Paroxetine        | ---    | ---  | ---   | ---  | ---    | ---  | ---   | ---  | ---    | ---  | ---   | ---  | ---     | ---  | ---   | ---  | 0.29   | 0.21 | 21.20 | 6.2  |
| Perphenazine      | 0.60   | 0.03 | 2.60  | 1.6  | ---    | ---  | ---   | ---  | ---    | ---  | ---   | ---  | ---     | ---  | ---   | ---  | 0.13   | 0.18 | 18.40 | 2.4  |
| Pimozide          | ---    | ---  | ---   | ---  | ---    | ---  | ---   | ---  | ---    | ---  | ---   | ---  | ---     | ---  | ---   | ---  | 0.33   | 0.05 | 4.60  | 1.5  |









|             | CYP2E1 |      |       |      | CYP3A4 |      |       |      | CYP3A5 |      |       |       | CYP26A1 |      |       |      | CYP4F12  |      |       |      |
|-------------|--------|------|-------|------|--------|------|-------|------|--------|------|-------|-------|---------|------|-------|------|----------|------|-------|------|
|             | Km     | k->0 | Clint | Vmax | Km     | k->0 | Clint | Vmax | Km     | k->0 | Clint | Vmax  | Km      | k->0 | Clint | Vmax | Km       | k->0 | Clint | Vmax |
| Sertraline  | ---    | ---  | ---   | ---  | ---    | ---  | ---   | ---  | ---    | ---  | ---   | ---   | ---     | ---  | ---   | ---  | ---      | ---  | ---   | ---  |
| Simvastatin | ---    | ---  | ---   | ---  | 2.86   | 0.18 | 17.70 | 50.6 | 1.45   | 0.10 | 9.90  | 14.4  | ---     | ---  | ---   | ---  | ---      | ---  | ---   | ---  |
| Tamoxifen   | ---    | ---  | ---   | ---  | 0.64   | 0.04 | 4.00  | 2.6  | 0.09   | 0.03 | 3.10  | 0.3   | ---     | ---  | ---   | ---  | ---      | ---  | ---   | ---  |
| Terfenadine | ---    | ---  | ---   | ---  | 0.12   | 0.03 | 2.50  | 0.3  | DNC    | DNC  | ---   | ---   | ---     | ---  | ---   | ---  | 0.58**** | ---  | 9.72  | 5.64 |
| Ticlopidine | DNC    | DNC  | ---   | ---  | DNC    | DNC  | ---   | ---  | 46.90  | 0.03 | 3.40  | 159.5 | ---     | ---  | ---   | ---  | ---      | ---  | ---   | ---  |
| Verapamil   | ---    | ---  | ---   | ---  | 1.71   | 0.04 | 4.30  | 7.4  | 4.66   | 0.01 | 1.30  | 6.1   | ---     | ---  | ---   | ---  | ---      | ---  | ---   | ---  |
| Warfarin    | ---    | ---  | ---   | ---  | ---    | ---  | ---   | ---  | ---    | ---  | ---   | ---   | ---     | ---  | ---   | ---  | ---      | ---  | ---   | ---  |

\* Does not converge

\*\* No turnover detected

\*\*\* Retinoic acid used as a positive control

\*\*\*\* Calculated from Metabolite formation data
